# Supplementary material for: Biological and Biochemical Characterization of Coronado Island Rattlesnake (Crotalus helleri caliginis) Venom and Antivenom Neutralization
Source: Toxins (Basel). 2021 Aug 21;13(8):582. doi: 10.3390/toxins13080582 (PMC8402616; doi:10.3390/toxins13080582)
Supplement: Supplementary file 1 [file toxins-13-00582-s001.zip › toxins-1286282.pdf]

## Supplementary Materials: Biological and Biochemical Characterization of Coronado Island Rattlesnake (*Crotalus helleri caliginis*) Venom and Antivenom Neutralization

Cristian Franco-Servín, Edgar Neri-Castro, Melisa Bénard-Valle, Alejandro Alagón, Ramsés Alejandro Rosales-García, Raquel Guerrero-Alba, José Emanuel Poblano-Sánchez, Marcelo Silva-Briano, Alma Lilián Guerrero-Barrera and José Jesús Sigala-Rodríguez

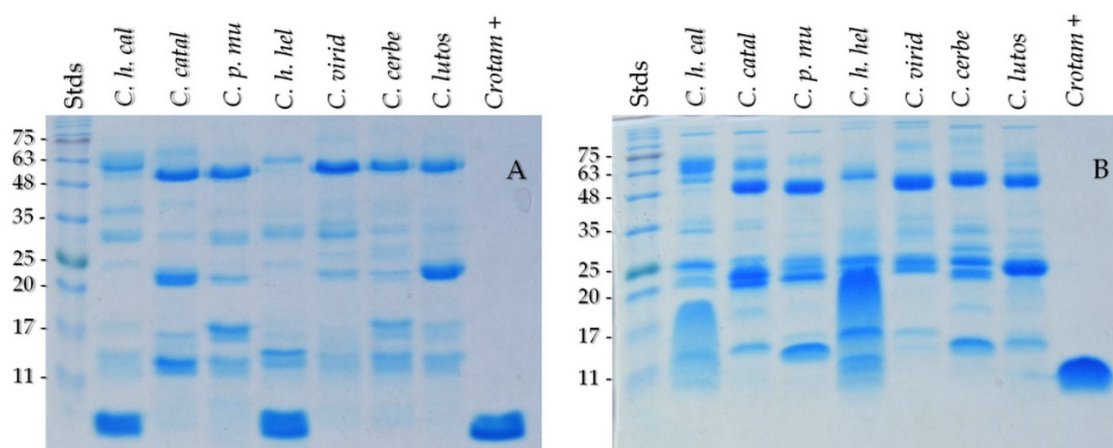

**Figure S1.** One dimensional SDS-PAGE at 15% analysis of *C. helleri caliginis*, *C. catalinensis*, *C. p. muertensis*, *C. helleri helleri*, *C. viridis*, *C. cerberus*, *C. lutosus* and Crotoamine positive (+) of *Crotalus molossus* under reducing conditions (A) and non-reducing conditions (B). Only *C. helleri caliginis* and *C. helleri helleri* were positive to crotoamine. A total amount of 20 µg of *Crotalus* venoms were loaded and only 5 µg of crotoamine +.

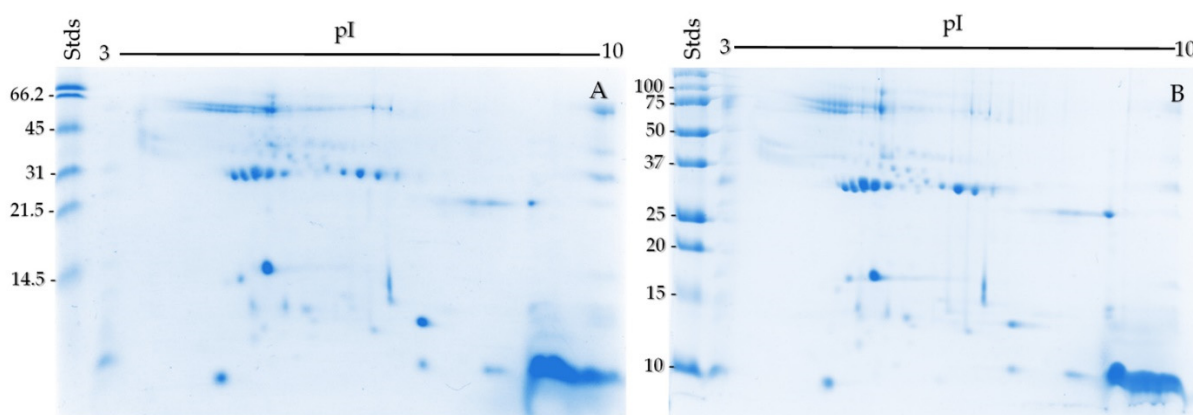

**Figure S2.** Two-dimensional SDS-PAGE of *C. helleri caliginis* venom under reducing conditions. A total of 150 µg was loaded on a IPG strip 3-10 isoelectric point range and 15% of polyacrylamide. Juvenile (A) and adult venom (B).

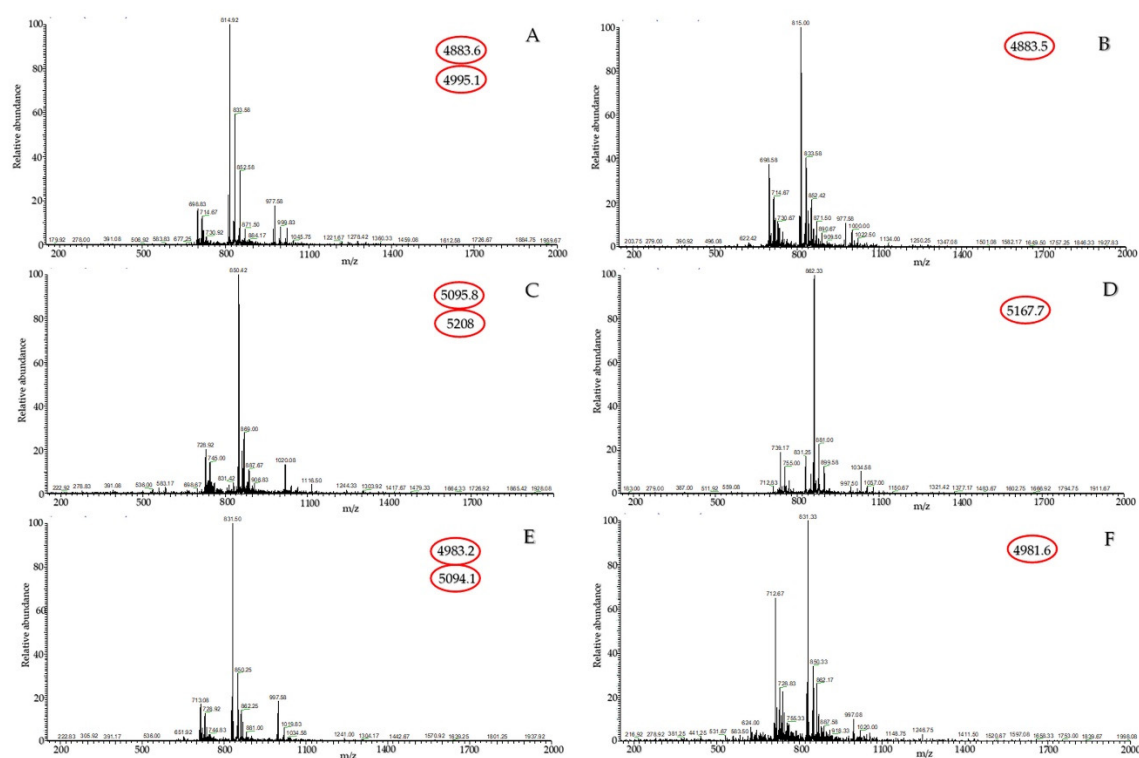

**Figure S3.** Mass spectrometric characterization of the *C. helleri caliginis* RP-HPLC fractions 3–8. The MSI analysis yielded nine molecular masses corresponding to the possible crotonamine isoforms (A–F).

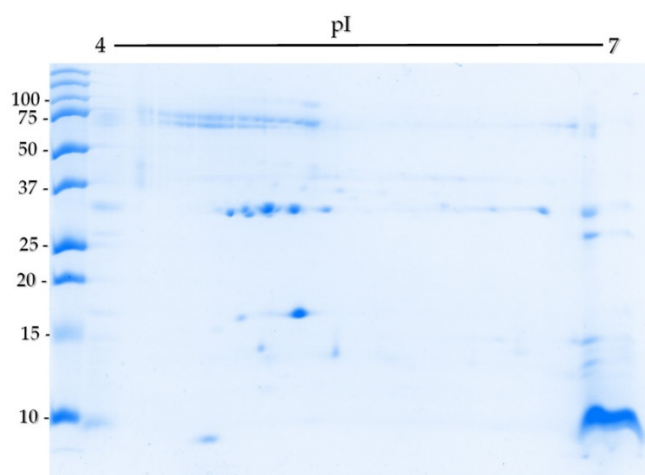

**Figure S4.** Two-dimensional SDS-PAGE of *C. helleri caliginis* venom under reducing conditions. A total of 100 µg was loaded on a IPG strip 4–7 isoelectric point range and 15% of polyacrylamide.
